# Supplementary material for: Optical orbital angular momentum conservation during the transfer process from plasmonic vortex lens to light
Source: PubMed Central journal article supplement — Sci Rep. 2013 Nov 12;3:3191. doi: 10.1038/srep03191 (PMC3824164; doi:10.1038/srep03191), 2013-11-12
Supplement: srep03191-s1.pdf [file srep03191-s1.pdf]

# Supplementary information for

## Optical orbital angular momentum conservation during the transfer process from plasmonic vortex lens to light

Haohai Yu,<sup>1\*</sup> Huaijin Zhang,<sup>1\*\*</sup> Yicheng Wang,<sup>1</sup> Shuo Han,<sup>1</sup> Haifang Yang,<sup>2</sup> Xiangang Xu<sup>1</sup>,  
Zhengping Wang,<sup>1</sup> V. Petrov<sup>3</sup> and Jiyang Wang<sup>1</sup>

<sup>1</sup>State Key Laboratory of Crystal Materials and Institute of Crystal Materials, Shandong  
University, Jinan 250100, China

<sup>2</sup>Laboratory of Microfabrication, Institute of Physics, Chinese Academy of Sciences, Beijing,  
100190, China

<sup>3</sup>Max-Born-Institute for Nonlinear Optics and Ultrafast Spectroscopy, 2A Max-Born-Strasse,  
12489 Berlin, Germany

### **Submitted to Scientific Reports**

\*) and \*\*) Corresponding author: Haohai Yu and Huaijin Zhang

Address: State Key Laboratory of Crystal Materials and Institute of Crystal Materials,  
Shandong University, Jinan 250100, China

Fax: +86-531-88574135

\*Email: haohaiyu@sdu.edu.cn

\*\*Email :huaijinzhang@sdu.edu.cn

## Theoretical analysis on the generating process surface plasmon (SP) vortices

The excitation of whole plasmonic vortex lens (PVLs) can be considered as convolution of a point source as following: <sup>1</sup>

$$E^{sp} \propto \sum_{n=1}^p \delta(r_m - r) G[\hat{n} \otimes \hat{n}] E_{\pm}^{in} \quad (1).$$

The in-plane component of near-field SP electric field  $E_{0+,m}$  in the slits of PVLs can be expressed as following:

$$E^{sp}_{0+,m}(r_i, z = 0) \propto G \times [E^{in}(r_m, z = 0) \times \hat{n}] \hat{n} \quad (2),$$

where,  $G = \frac{e^{ik_{sp}|r_i - r_m|}}{|r_i - r_m|^{1/2}}$  is the Huygens-Fresnel plasmonic propagator,  $\hat{n} = f^{-1}(\frac{d^2 r_m}{ds^2})$

is the local unit normal vector determined from the curvature  $f$  and the arc length  $s$  of the nanoslit, and  $E^{in}$  is the incident electric field. The resulted SP electric field is the integral of elementary point sources over the whole PVL as:

$$E^{sp} = C_{in} \bullet E^{in} \quad (3).$$

$$\propto \int_0^{2\pi} d\varphi e^{im\varphi - ik_{sp}r_i \cos\varphi} \hat{r} \otimes \hat{r} \bullet E^{in}$$

The incident electric field  $E^{in}$  is the  $LG_{p,l}$  laser mode with linear polarization along X direction

$\hat{x}$ :

$$E^{in}(r, \varphi, z) \propto \frac{p}{w} \exp\left[\frac{-ikr^2z}{2(z_R^2 + z^2)} - \frac{r^2}{w^2}\right] \exp[-i(2p + l + 1) \arctan(z / z_R)] \quad (4).$$

$$\times \exp[-i l \varphi] (-1)^p \left(\frac{\sqrt{2}r}{w}\right)^{|l|} L_p^{|l|}\left(\frac{2r^2}{w^2}\right) \hat{x}$$

Here,  $p$  and  $l$  are the radial and azimuthal indexes of the mode respectively,  $k$  is the wavenumber of light in free space,  $w$  is the beam waist,  $z_R$  is the Rayleigh rang of the mode, and  $L_p^{|l|}(x)$  is the Laguerre polynomials.

Since the Bessel function is  $J_a(x) = \frac{1}{2\pi} \int_0^{2\pi} e^{i(at - x \sin t)} dt$ , with the waveguide

model,<sup>1-5</sup> the corresponding  $z$ -directional field electric field of the SP vortices is mathematically represented by the  $n$ -th order Bessel function  $J_n(x)$  and Laguerre-Gaussian function with a spiral phase profile given with a scalar equation by:

$$E_{z,n}(r, \varphi, z) \propto J_{|n|}(k_{sp}r) \exp\left[in\left(\varphi + \frac{\pi}{2}\right)\right] L_p^{|l|}\left(\frac{2r^2}{w^2}\right) \exp\left(-\frac{r^2}{w^2}\right) \quad (5).$$

With the angular momentum operator  $\hat{L}_z = -i\hbar \frac{\partial}{\partial \varphi}$ , it can be found that the  $LG_{p,l}$  laser mode possesses the orbital angular momentum of  $l\hbar$  per photon, and the generated SP vortices have orbital angular momentum of  $n\hbar = (l + m)\hbar$  per photon which represents the twisted wavefront.

#### **Angular momentum conservation with the $m=-7$ PVL**

The achieved experimental patterns and theoretical analysis of SP vortices with  $l=-1$  and  $-2$ , and  $m=-7$  are presented in Fig.1. The intensity distribution of cross sections (red line) through the center are presented in Fig.1 (c) and (d). The theoretical analysis shows that the total angular momentum per photon of SP vortices is  $n = l + m$  and the total angular momentum is conserved.

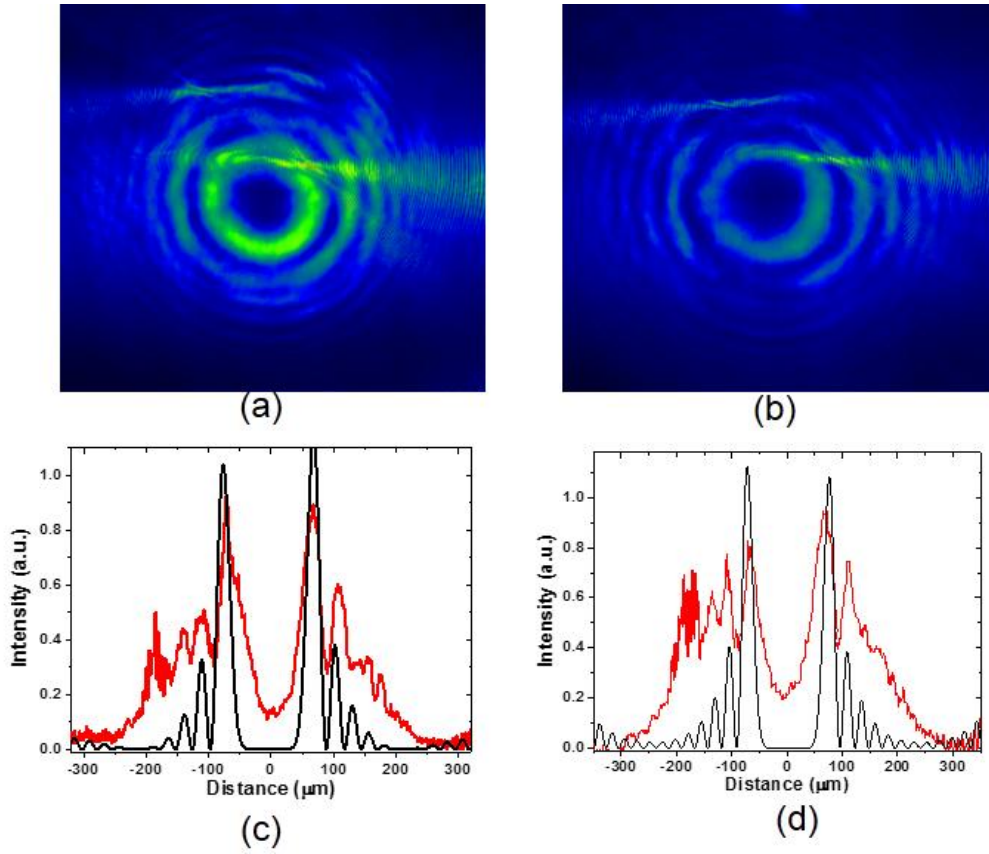

Figure 1 Experimental patterns and theoretical analysis of the SP vortices using a PVL with  $m=-7$ . (a) and (b) Experimental patterns using linear polarized  $\text{LG}_{0,-1}$  and  $\text{LG}_{0,-2}$  modes and a PVL with  $m=-7$ . (c) and (d) Experimental data (red lines) of the intensity distribution through the center of obtained SP vortex patterns corresponding the patterns (a) and (b), respectively, and the theoretical fitting (black lines) of experimental data (red lines) with respective  $|E_{z,n}|^2$  functions shown in eq. (5) with  $n=-8$  and  $-9$ .

References:

1. Gorodetski, Y., Drezet, A., Genet, C. & Ebbesen, T. W. Phys. Rev. Lett. 110, 203906 (2013).
2. Chang, S. H., Gray, S. K. & Schatz, G. C. Opt. Express. 13, 3150 (2005).
3. Kim, H., Park, J., Cho, S., Lee, S., Kang M. & Lee, B. Nano Lett. 10, 529 (2010).
4. Bloch, N. V., Shemer, K., Shapira, A., Shiloh, R., Juwiler, I. & Arie, A. Phys. Rev. Lett. 108, 233902 (2012).
5. Nikitin, A. Yu., Zueco, D., Garc ía-Vidal, F. J. & Mart ín-Moreno, L. Phys. Rev. B 78, 165429 (2008).
